# Supplementary material for: Moderation of textural properties in hierarchical ZSM-5 to enhance the yield of olefins in catalytic cracking of hydrocarbons
Source: Royal Society of Chemistry journal article supplement (doi:10.1039/d2cy02137d), 2023-01-01
Supplement: d2cy02137d1.pdf [file d2cy02137d1.pdf]

## Supporting Information

### Moderation of Textural Properties in Hierarchical ZSM-5 to Enhance Yield of Olefins in Catalytic Cracking of Hydrocarbons

Siying Liu<sup>a</sup>, Yajie Tian<sup>a,c,\*</sup>, Xinyu He<sup>a</sup>, Yong Liu<sup>a</sup>, Congzhen Qiao<sup>a</sup>, Guozhu Liu<sup>b,c,\*</sup>

<sup>a</sup> Henan Engineering Research Center of Functional Materials and Catalytic Reaction, Green Energy and Materials International Joint Lab, College of Chemistry and Chemical Engineering, Henan University, Kaifeng 475004, China

<sup>b</sup> Key Laboratory for Green Chemical Technology of Ministry of Education, School of Chemical Engineering and Technology, Tianjin University, Tianjin, 300072, China

<sup>c</sup> Haihe Laboratory of Sustainable Chemical Transformations, Tianjin 300192, China

Corresponding Authors: [yjtian@henu.edu.cn](mailto:yjtian@henu.edu.cn) (Y. T); [gliu@tju.edu.cn](mailto:gliu@tju.edu.cn) (G. L)

#### 1. Materials

Aluminum isopropoxide (AIP,  $\geq 98.0\%$  pure) was purchased from Shanghai Aladdin Biochemical Technology Co, Ltd (Shanghai, China). Tetrabutylphosphonium hydroxide (TBPOH, 40 wt% in H<sub>2</sub>O) and tetrabutylphosphorus hydroxide (TPAOH, 25 wt% in H<sub>2</sub>O) were purchased from Toshii Kasei Industrial Development company (Shanghai, China). Tetraethylorthosilicate (TEOS,  $\geq 98\%$  pure) and *n*-pentane ( $\geq 99\%$  pure) were purchased from Kermel Chemical Reagent company (Tianjin, China.). NaOH ( $\geq 99.0\%$  pure) was purchased from Tianjin Deen Chemical Reagent company. Aluminum sulfate (Al<sub>2</sub>(SO<sub>4</sub>)<sub>3</sub>·18H<sub>2</sub>O,  $\geq 99\%$  pure) was purchased from Tianjin Guangfu Science and Technology Development company (Tianjin, China).

## 2. Characterizations

X-ray diffraction (XRD) detections were carried out by a Philips X'Pert MPD diffractometer with Cu-K $\alpha$  radiation source (0.154 nm). The surface morphology of zeolites was observed through a FEI scanning electron microscopy (SEM, Nova NanoSEM 450). The transmission electron microscopy (TEM) images was acquired using an JEOL electron microscope (JEM-F200). Elemental analysis characterization was quantified by an inductively coupled plasma-optical emission spectroscopy (ICP-OES, Optima 2100DV). N<sub>2</sub> adsorption-desorption measurements were conducted at on an Autosorb-iQ2-MP (Quantachrome Instruments).

All the chemisorption detections were performed on AMI-300 (Altamira Instruments) instrument. In ammonia temperature-programmed desorption (NH<sub>3</sub>-TPD), 50 mg of sample was treated in a flow of He to remove any physisorbed NH<sub>3</sub> and then the temperature was raised to 600 °C at a rate of 10 °C/min to obtain any chemically adsorbed NH<sub>3</sub>. Infrared spectroscopy (IR) was performed using a Bruker VERTEX 70 spectrometer. Each spectrum was recorded with 64 scans with a resolution of 4 cm<sup>-1</sup>. In pyridine-adsorbed IR (Py-IR) spectroscopy detection, each sample was pressed into a self-supported wafer and activated at 400 °C for 1 h under high vacuum. The adsorption of pyridine was performed at 50 °C, and the spectrums were collected at 200 °C

### Calculation of TOF values

The turnover frequency (TOF) of *n*-pentane conversion is determined as:

$$TOF = \frac{X \times WHSV}{T_{BAS} \times M_{n-pentane}}$$

Where X (%) is the conversion of *n*-pentane. *WHSV* is the weight hourly space velocity of the reaction.  $T_{BAS}$  ( $\mu\text{mol} \cdot \text{NH}_3 \cdot \text{g}^{-1}$ ) is the total amount of Brønsted acidities. And  $M_{n-pentane}$  ( $\text{g} \cdot \text{mol}^{-1}$ ) is molar mass of *n*-pentane. We have revised the manuscript.
